# Supplementary material for: FlyAtlas 2: a new version of the Drosophila melanogaster expression atlas with RNA-Seq, miRNA-Seq and sex-specific data
Source: PubMed Central journal article supplement (PMC5753349; doi:10.1093/nar/gkx976), 2017-10-24
Supplement: gkx976_supp.pdf [file gkx976_supp.pdf]

## Supplementary Data

### **FlyAtlas 2: A new version of the *Drosophila melanogaster* expression atlas with RNA-Seq, miRNA-Seq and sex-specific data**

**David P. Leader, Sue A. Krause, Aniruddha Pandit, Shireen A. Davies and Julian A. T. Dow**

Institute of Molecular Cell and Systems Biology, College of Medical, Veterinary and Life Sciences, University of Glasgow, Glasgow G12 8QQ, UK

### **Table of Contents**

|                                                                                                                                                                 |    |
|-----------------------------------------------------------------------------------------------------------------------------------------------------------------|----|
| Table S1. Details of <i>Drosophila</i> tissues used in FlyAtlas .....                                                                                           | 2  |
| Table S2. Tables in the relational database, FlyAtlas 2.....                                                                                                    | 3  |
| Table S3. Validation of FlyAtlas 2 data set by reference to genes with extreme specificity of expression in particular tissues .....                            | 5  |
| Table S4. Validation of FlyAtlas 2 data set by comparison with results of Fagegaltier <i>et al.</i> for most highly enriched microRNAs in testis and ovary..... | 6  |
| Table S5. Comparison of FlyAtlas 2 and FlyAtlas 1 data for 60 most highly expressed genes in the Malpighian tubules .....                                       | 7  |
| Table S6. Genes for which there are no data in FlyAtlas 2 because their transcripts are indistinguishable from those of other genes .....                       | 11 |
| Table S7. Transcripts for which there are no data in FlyAtlas 2 .....                                                                                           | 13 |
| Table S8. RNA genes detected in FlyAtlas 2. ....                                                                                                                | 14 |
| Figure S1. Relational database schema for FlyAtlas 2 .....                                                                                                      | 15 |
| Figure S2. Validation of FlyAtlas 2 data set by reference to genes the transcripts of which show well-characterized sexual dimorphism in soma.....              | 16 |
| Figure S3. Responsive adaptation of FlyAtlas 2 search output to mobile devices.....                                                                             | 17 |
| References for Supplementary Data .....                                                                                                                         | 18 |

**Table S1.** Number of flies used and yields of total RNA for different tissues

| Tissue             | Adult     |                   | Larvae    |                   |
|--------------------|-----------|-------------------|-----------|-------------------|
|                    | No. flies | RNA (ng/ $\mu$ l) | No. flies | RNA (ng/ $\mu$ l) |
| Whole              | 10        | 830               | 10        | 1220              |
| Carcass            | 35        | 310               | 15        | 415               |
| Midgut             | 80        | 480               | 15        | 310               |
| Hindgut            | 1100      | 330               | 100       | 220               |
| Anal Pad           | 1690      | 202               | —         | —                 |
| Malpighian Tubules | 210       | 430               | 75        | 380               |
| Head               | 10        | 130*              | —         | —                 |
| Ovary              | 16        | 1620              | —         | —                 |
| Testis             | 60        | 275               | —         | —                 |
| Accessory Gland    | 118       | 310               | —         | —                 |
| Brain              | 320       | 210               | 55        | 445               |
| Salivary Gland     |           |                   | 50        | 480               |
| Trachea            | —         | —                 | 230       | 230               |
| Fat Body           | —         | —                 | 12        | 245               |

\*Although this is less than the 200 ng/ $\mu$ l normally required, the RNA passed quality control and yielded satisfactory RNA-Seq data.

**Table S2.** Tables in the MySQL relational database, FlyAtlas 2**Gene**

| Field       | Type         | Null | Key | Default | Extra |
|-------------|--------------|------|-----|---------|-------|
| FBgn        | char(11)     | NO   | PRI | NULL    |       |
| CGNum       | varchar(10)  | YES  |     | NULL    |       |
| Symbol      | varchar(40)  | YES  |     | NULL    |       |
| Name        | varchar(100) | YES  |     | NULL    |       |
| RomanSymbol | varchar(100) | YES  |     | NULL    |       |
| RomanName   | varchar(200) | YES  |     | NULL    |       |
| Locus       | varchar(40)  | NO   |     | NULL    |       |
| BioType     | varchar(25)  | NO   |     | NULL    |       |

**Ambiguity**

| Field       | Type     | Null | Key | Default | Extra |
|-------------|----------|------|-----|---------|-------|
| MaskedFBgn  | char(11) | NO   | PRI | NULL    |       |
| MaskingFBgn | char(11) | NO   | PRI | NULL    |       |

**GeneWithOntol**

| Field | Type     | Null | Key | Default | Extra |
|-------|----------|------|-----|---------|-------|
| FBgn  | char(11) | NO   | PRI | NULL    |       |
| GOid  | char(7)  | NO   | PRI | NULL    |       |

**Ontology**

| Field  | Type         | Null | Key | Default | Extra |
|--------|--------------|------|-----|---------|-------|
| GOid   | char(7)      | NO   | PRI | NULL    |       |
| GOname | varchar(250) | NO   |     | NULL    |       |
| GOType | varchar(18)  | NO   |     | NULL    |       |

**Transcript**

| Field          | Type           | Null | Key | Default | Extra |
|----------------|----------------|------|-----|---------|-------|
| FBgn           | char(11)       | NO   | MUL | NULL    |       |
| FBtr           | char(11)       | NO   | PRI | NULL    |       |
| TranscriptName | varchar(50)    | NO   |     | NULL    |       |
| Strand         | enum('+', '-') | NO   |     | NULL    |       |
| ExonCount      | int(3)         | NO   |     | NULL    |       |
| ExonStarts     | varchar(1000)  | NO   |     | NULL    |       |
| ExonEnds       | varchar(1000)  | NO   |     | NULL    |       |

**Tissue**

| Field        | Type                           | Null | Key | Default | Extra |
|--------------|--------------------------------|------|-----|---------|-------|
| TissueID     | int(3)                         | NO   | PRI | NULL    |       |
| Stage        | enum('Adult', 'Larval')        | YES  |     | NULL    |       |
| Sex          | enum('Male', 'Female', 'Both') | YES  |     | NULL    |       |
| TissueName   | varchar(30)                    | NO   |     | NULL    |       |
| Abbreviation | char(2)                        | NO   |     | NULL    |       |
| UniTissueID  | int(2)                         | NO   | MUL | NULL    |       |
| Reference    | enum('Yes', 'No')              | NO   |     | NULL    |       |
| Replicates   | int(11)                        | NO   |     | 0       |       |

### UniTissue

| Field         | Type        | Null | Key | Default | Extra |
|---------------|-------------|------|-----|---------|-------|
| UniTissueID   | int(2)      | NO   | PRI | NULL    |       |
| UniTissueName | varchar(30) | NO   |     | NULL    |       |

### GeneFPKM

| Field      | Type        | Null | Key | Default | Extra |
|------------|-------------|------|-----|---------|-------|
| FBgn       | char(11)    | NO   | PRI | NULL    |       |
| TissueID   | int(3)      | NO   | PRI | NULL    |       |
| FPKM       | double(8,2) | NO   |     | NULL    |       |
| Replicate1 | double(8,2) | NO   |     | NULL    |       |
| Replicate2 | double(8,2) | NO   |     | NULL    |       |
| Replicate3 | double(8,2) | NO   |     | NULL    |       |
| SD         | double(8,2) | NO   |     | NULL    |       |

### TranscriptFPKM

| Field      | Type        | Null | Key | Default | Extra |
|------------|-------------|------|-----|---------|-------|
| FBtr       | char(11)    | NO   | PRI | NULL    |       |
| TissueID   | int(3)      | NO   | PRI | NULL    |       |
| FPKM       | double(8,2) | NO   |     | NULL    |       |
| Replicate1 | double(8,2) | NO   |     | NULL    |       |
| Replicate2 | double(8,2) | NO   |     | NULL    |       |
| Replicate3 | double(8,2) | NO   |     | NULL    |       |
| SD         | double(8,2) | NO   |     | NULL    |       |

### GeneRPM

| Field      | Type     | Null | Key | Default | Extra |
|------------|----------|------|-----|---------|-------|
| FBgn       | char(11) | NO   | PRI | NULL    |       |
| TissueID   | int(3)   | NO   | PRI | NULL    |       |
| RPM        | int(11)  | NO   |     | NULL    |       |
| Replicate1 | int(11)  | NO   |     | NULL    |       |
| Replicate2 | int(11)  | NO   |     | NULL    |       |
| Replicate3 | int(11)  | NO   |     | NULL    |       |
| SD         | int(11)  | NO   |     | NULL    |       |

### TranscriptRPM

| Field      | Type     | Null | Key | Default | Extra |
|------------|----------|------|-----|---------|-------|
| FBtr       | char(11) | NO   | PRI | NULL    |       |
| TissueID   | int(3)   | NO   | PRI | NULL    |       |
| RPM        | int(11)  | NO   |     | NULL    |       |
| Replicate1 | int(11)  | NO   |     | NULL    |       |
| Replicate2 | int(11)  | NO   |     | NULL    |       |
| Replicate3 | int(11)  | NO   |     | NULL    |       |
| SD         | int(11)  | NO   |     | NULL    |       |

**Table S3.** Validation of FlyAtlas 2 data set by reference to genes with extreme specificity of expression in particular tissues

| Gene           | Head               | Midgut              | Malpighian Tubules | Hindgut            | Ovary             | Testis              |
|----------------|--------------------|---------------------|--------------------|--------------------|-------------------|---------------------|
| <b>trp</b>     | <b>134</b><br>2650 | 0.1<br>0            | 0<br>0             | 0<br>0             | 0<br>0            | 0<br>0              |
| <b>Jon99Ci</b> | 0<br>12            | <b>1998</b><br>6335 | 11.4<br>0          | 7.6<br>0           | 0<br>0            | 0.4<br>11           |
| <b>CG15408</b> | 0<br>0             | 0.6<br>0            | <b>597</b><br>4338 | 0.1<br>0           | 0<br>0            | 2.2<br>7            |
| <b>CG9993</b>  | 0<br>0             | 0.2<br>0.1          | 2.4<br>1           | <b>595</b><br>2648 | 0.1<br>0          | 0.2<br>0            |
| <b>otu</b>     | 0<br>0             | 0.2<br>8            | 0.8<br>0           | 0.5<br>0           | <b>59</b><br>1353 | 1.4<br>6            |
| <b>Mst84Dd</b> | 1.1<br>0           | 0.1<br>0            | 0.3<br>0           | 13<br>0            | 1<br>0            | <b>4997</b><br>2526 |

**Red:** FlyAtlas 2; **Blue:** FlyAtlas 1 (1)

Units are arbitrary signal units in the case of FlyAtlas 1, and FPKM in the case of FlyAtlas 2.

**Table S4.** Validation of FlyAtlas 2 data set by comparison with results of Fagegaltier *et al.*(2) for the most highly enriched microRNAs in testis and ovary

| mir     | Fagegaltier <i>et al.</i> |              |      | This study |              |      |
|---------|---------------------------|--------------|------|------------|--------------|------|
|         | Testis                    | Testis/Total | Rank | Testis     | Testis/Total | Rank |
| mir-975 | 7469                      | 1.00         | 1    | 2218       | 0.98         | na   |
| mir-310 | 11746                     | 1.00         | 2    | 7931       | 0.97         | 8    |
| mir-311 | 12537                     | 0.99         | 3    | 56554      | 0.98         | 5    |
| mir-959 | 60382                     | 0.99         | 4    | 7035       | 0.98         | 7    |
| mir-978 | 29600                     | 0.99         | 5    | 495        | 0.99         | na   |
| mir-964 | 35403                     | 0.99         | 6    | 5035       | 0.98         | na   |
| mir-976 | 26338                     | 0.99         | 7    | 13366      | 0.98         | 3    |
| mir-312 | 5964                      | 0.98         | 8    | 46104      | 0.98         | 4    |
| mir-977 | 28350                     | 0.98         | 9    | 294        | 0.98         | na   |
| mir-983 | 23562                     | 0.97         | 10   | 1367       | 0.97         | na   |
| mir-988 | 23055                     | 0.96         | 11   | 546        | 0.84         | na   |
| mir-984 | 7704                      | 0.93         | 12   | 1643       | 0.98         | na   |
| mir-960 | 19026                     | 0.92         | 13   | 20604      | 0.99         | 2    |
| mir-12  | 217798                    | 0.91         | 14   | 27109      | 0.83         | 11   |
| mir-274 | 27748                     | 0.89         | 15   | 4689       | 0.63         | na   |
| mir-317 | 15712                     | 0.87         | 16   | 74325      | 0.57         | 22   |
| mir-9b  | 23545                     | 0.85         | 17   | 3956       | 0.89         | na   |
| mir-305 | 65041                     | 0.82         | 18   | 11126      | 0.65         | na   |
| mir-34  | 40124                     | 0.81         | 19   | 13599      | 0.46         | 24   |
| mir-316 | 15460                     | 0.74         | 20   | 4022       | 0.79         | na   |
| mir-11  | 32372                     | 0.69         | 21   | 20971      | 0.61         | 21   |
| mir-125 | 11659                     | 0.69         | 22   | 2108       | 0.62         | na   |

| mir     | Fagegaltier <i>et al.</i> |             |      | This study |             |      |
|---------|---------------------------|-------------|------|------------|-------------|------|
|         | Ovary                     | Ovary/Total | Rank | Ovary      | Ovary/Total | Rank |
| mir-318 | 34886                     | 1.00        | 1    | 122908     | 0.76        | 13   |
| mir-994 | 14463                     | 0.99        | 2    | 18545      | 0.82        | 12   |
| mir-275 | 12586                     | 0.94        | 3    | 10347      | 0.83        | 10   |
| mir-989 | 88414                     | 0.87        | 4    | 20745      | 0.88        | 1    |
| mir-9b  | 10570                     | 0.87        | 5    | 9038       | 0.85        | 4    |
| mir-184 | 30821                     | 0.80        | 6    | 152506     | 0.65        | 18   |
| mir-996 | 28482                     | 0.78        | 7    | 3193       | 0.73        | na   |
| mir-79  | 6723                      | 0.75        | 8    | 90         | 0.79        | na   |
| mir-33  | 4025                      | 0.67        | 9    | 12173      | 0.59        | 22   |
| mir-34  | 6344                      | 0.66        | 10   | 1744       | 0.16        | na   |

na = not applicable as signal < 5% max

The absolute values for expression of transcripts are not comparable between the two studies although each employs the three-colour scale, shown.

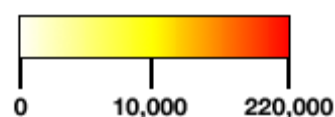

**Table S5.** Comparison of FlyAtlas 2 and FlyAtlas 1 data for 60 most highly expressed genes in the Malpighian tubules

(i) Ordered by most enriched genes in FlyAtlas 1

| Gene    | FlyAtlas 1 |       |         | FlyAtlas 2 |       |         |
|---------|------------|-------|---------|------------|-------|---------|
|         | Abundance  | Whole | Enrich. | FPKM       | Whole | Enrich. |
| CG4314  | 4177       | 45    | 93      | 190        | 4.7   | 40      |
| CG9270  | 1106       | 13    | 81      | 54         | 1.3   | 42      |
| CG33282 | 798        | 10    | 73      | 103        | 1.3   | 79      |
| CG15088 | 918        | 13    | 68      | 95         | 5.1   | 19      |
| CG18095 | 980        | 14    | 68      | 271        | 4.6   | 59      |
| CG13905 | 1534       | 22    | 67      | 289        | 3.7   | 78      |
| CG3212  | 281        | 4     | 64      | 40         | 0.7   | 57      |
| CG15408 | 4337       | 67    | 64      | 597        | 13    | 46      |
| CG13311 | 1876       | 29    | 63      | 428        | 9.3   | 46      |
| CG8837  | 1088       | 17    | 61      | 101        | 3.7   | 27      |
| CG10207 | 2613       | 43    | 60      | 946        | 17.9  | 53      |
| CG8028  | 2008       | 34    | 59      | 212        | 5     | 42      |
| CG8620  | 979        | 16    | 59      | 156        | 2.4   | 65      |
| CG17751 | 1859       | 31    | 58      | 196        | 3.4   | 58      |
| CG31792 | 218        | 3     | 58      | 13         | 0.3   | 43      |
| CG1139  | 1727       | 30    | 58      | 116        | 7.8   | 15      |
| CG18473 | 4250       | 75    | 56      | 297        | 7.1   | 42      |
| CG16727 | 2501       | 44    | 56      | 283        | 4.6   | 62      |
| CG9717  | 1989       | 37    | 53      | 113        | 5.4   | 21      |
| CG3285  | 3501       | 67    | 52      | 364        | 8.9   | 41      |
| CG33281 | 1936       | 39    | 49      | 131        | 6     | 22      |
| CG42235 | 1425       | 29    | 49      | 1542       | 29.5  | 52      |
| CG13977 | 2635       | 54    | 49      | 437        | 10.2  | 43      |
| CG6465  | 3646       | 78    | 46      | 226        | 5.8   | 39      |
| CG15221 | 594        | 13    | 45      | 62         | 1.7   | 36      |
| CG34043 | 4207       | 94    | 44      | 825        | 11.1  | 74      |
| CG15155 | 5291       | 120   | 44      | 1695       | 33    | 51      |
| CG10369 | 4932       | 115   | 43      | 418        | 10    | 42      |
| CG3270  | 6215       | 147   | 42      | 903        | 22.5  | 40      |
| CG14606 | 1468       | 34    | 42      | 276        | 5.6   | 49      |
| CG14575 | 512        | 12    | 42      | 49         | 1.1   | 45      |
| CG6602  | 3426       | 81    | 42      | 805        | 15    | 54      |
| CG17752 | 6340       | 156   | 40      | 1131       | 18    | 63      |
| CG17110 | 1174       | 29    | 40      | 91         | 1.6   | 57      |
| CG2759  | 1571       | 39    | 40      | 127        | 4.3   | 30      |
| CG31272 | 6019       | 151   | 40      | 533        | 8.4   | 63      |
| CG30277 | 1637       | 42    | 39      | 212        | 4.3   | 49      |
| CG31106 | 5145       | 133   | 38      | 710        | 12.2  | 58      |
| CG31663 | 1365       | 36    | 38      | 210        | 5.8   | 36      |
| CG34456 | 303        | 8     | 38      | 67         | 2     | 34      |
| CG32024 | 2491       | 67    | 37      | 593        | 10.3  | 58      |
| CG6125  | 4530       | 122   | 37      | 319        | 8.3   | 38      |
| CG17027 | 1526       | 41    | 37      | 210        | 6.8   | 31      |
| CG5697  | 3029       | 82    | 37      | 302        | 8.3   | 36      |
| CG32024 | 2492       | 67    | 37      | 593        | 10.3  | 58      |
| CG10626 | 348        | 9     | 36      | 22         | 0.8   | 28      |

|         |      |      |    |      |      |     |
|---------|------|------|----|------|------|-----|
| CG32023 | 4818 | 133  | 36 | 1000 | 21   | 48  |
| CG15556 | 1187 | 33   | 36 | 69   | 4.6  | 15  |
| CG7171  | 6590 | 183  | 36 | 940  | 9.4  | 100 |
| CG10006 | 902  | 25   | 36 | 365  | 7.3  | 50  |
| CG32843 | 992  | 28   | 35 | 45   | 1.8  | 25  |
| CG9702  | 2377 | 67   | 35 | 223  | 8    | 28  |
| CG30016 | 3945 | 112  | 35 | 1503 | 45   | 33  |
| CG31380 | 948  | 27   | 34 | 112  | 4    | 28  |
| CG3690  | 566  | 16   | 34 | 356  | 6.7  | 53  |
| CG14957 | 1989 | 60   | 33 | 312  | 5.2  | 60  |
| CG2187  | 2332 | 72   | 32 | 20   | 0.7  | 29  |
| CG9444  | 398  | 12   | 32 | 31   | 0.7  | 44  |
| CG5361  | 535  | 16   | 32 | 49   | 0.8  | 61  |
| CG4484  | 1386 | 44   | 31 | 133  | 6.4  | 21  |
| CG31097 | 374  | 19   | 20 | 101  | 1.5  | 67  |
| CG33258 | 6982 | 383  | 18 | 1051 | 15.7 | 67  |
| CG9259  | 7558 | 370  | 19 | 2756 | 49   | 56  |
| CG2196  | 7242 | 275  | 26 | 1854 | 33   | 56  |
| CG11892 | 7339 | 506  | 14 | 2885 | 52   | 55  |
| CG10514 | 6203 | 438  | 14 | 1690 | 31   | 55  |
| CG15406 | 4941 | 165  | 30 | 1106 | 20.5 | 54  |
| CG3290  | 5919 | 314  | 19 | 856  | 16   | 54  |
| CG6726  | 8244 | 585  | 14 | 1912 | 36   | 53  |
| CG17636 | 811  | 26   | 31 | 119  | 2.4  | 50  |
| CG7882  | 3485 | 129  | 27 | 1010 | 21   | 48  |
| CG42807 | 7441 | 1112 | 7  | 1680 | 35   | 48  |
| CG2680  | 3243 | 110  | 30 | 747  | 15.8 | 47  |
| CG17522 | 3138 | 114  | 28 | 434  | 9.2  | 47  |
| CG8791  | 2754 | 98   | 28 | 178  | 3.8  | 47  |
| CG3168  | 7340 | 734  | 10 | 3617 | 82   | 44  |
| CG7874  | 6383 | 1213 | 5  | 5921 | 136  | 44  |
| CG10513 | 6469 | 309  | 21 | 1172 | 28   | 42  |
| CG3380  | 6251 | 227  | 27 | 582  | 14   | 42  |
| CG14857 | 182  | 8    | 21 | 90   | 2.2  | 41  |
| CG13309 | 5652 | 214  | 26 | 3051 | 75   | 41  |

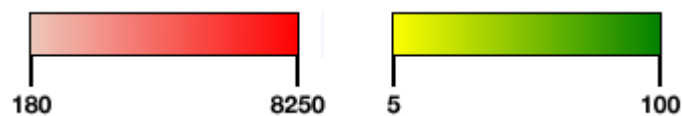

The abundance values for FlyAtlas 1 are in arbitrary units. The 'Enrich.' column is the enrichment calculated by dividing the absolute value of expression in Malpighian tubules by that in whole flies.



## (ii) Ordered by most enriched genes in FlyAtlas 2

| Gene    | FlyAtlas 1 |       |         | FlyAtlas 2 |       |         |
|---------|------------|-------|---------|------------|-------|---------|
|         | Abundance  | Whole | Enrich. | FPKM       | Whole | Enrich. |
| CG7171  | 6590       | 183   | 36      | 940        | 9.4   | 100     |
| CG33282 | 798        | 10    | 73      | 103        | 1.3   | 79      |
| CG13905 | 1534       | 22    | 67      | 289        | 3.7   | 78      |
| CG34043 | 4207       | 94    | 44      | 825        | 11.1  | 74      |
| CG8620  | 979        | 16    | 59      | 156        | 2.4   | 65      |
| CG31272 | 6019       | 151   | 40      | 533        | 8.4   | 63      |
| CG17752 | 6340       | 156   | 40      | 1131       | 18    | 63      |
| CG16727 | 2501       | 44    | 56      | 283        | 4.6   | 62      |
| CG5361  | 535        | 16    | 32      | 49         | 0.8   | 61      |
| CG14957 | 1989       | 60    | 33      | 312        | 5.2   | 60      |
| CG18095 | 980        | 14    | 68      | 271        | 4.6   | 59      |
| CG31106 | 5145       | 133   | 38      | 710        | 12.2  | 58      |
| CG17751 | 1859       | 31    | 58      | 196        | 3.4   | 58      |
| CG32024 | 2491       | 67    | 37      | 593        | 10.3  | 58      |
| CG32024 | 2492       | 67    | 37      | 593        | 10.3  | 58      |
| CG3212  | 281        | 4     | 64      | 40         | 0.7   | 57      |
| CG17110 | 1174       | 29    | 40      | 91         | 1.6   | 57      |
| CG6602  | 3426       | 81    | 42      | 805        | 15    | 54      |
| CG3690  | 566        | 16    | 34      | 356        | 6.7   | 53      |
| CG10207 | 2613       | 43    | 60      | 946        | 17.9  | 53      |
| CG42235 | 1425       | 29    | 49      | 1542       | 29.5  | 52      |
| CG15155 | 5291       | 120   | 44      | 1695       | 33    | 51      |
| CG10006 | 902        | 25    | 36      | 365        | 7.3   | 50      |
| CG30277 | 1637       | 42    | 39      | 212        | 4.3   | 49      |
| CG14606 | 1468       | 34    | 42      | 276        | 5.6   | 49      |
| CG32023 | 4818       | 133   | 36      | 1000       | 21    | 48      |
| CG13311 | 1876       | 29    | 63      | 428        | 9.3   | 46      |
| CG15408 | 4337       | 67    | 64      | 597        | 13    | 46      |
| CG14575 | 512        | 12    | 42      | 49         | 1.1   | 45      |
| CG9444  | 398        | 12    | 32      | 31         | 0.7   | 44      |
| CG31792 | 218        | 3     | 58      | 13         | 0.3   | 43      |
| CG13977 | 2635       | 54    | 49      | 437        | 10.2  | 43      |
| CG8028  | 2008       | 34    | 59      | 212        | 5     | 42      |
| CG18473 | 4250       | 75    | 56      | 297        | 7.1   | 42      |
| CG10369 | 4932       | 115   | 43      | 418        | 10    | 42      |
| CG9270  | 1106       | 13    | 81      | 54         | 1.3   | 42      |
| CG3285  | 3501       | 67    | 52      | 364        | 8.9   | 41      |
| CG4314  | 4177       | 45    | 93      | 190        | 4.7   | 40      |
| CG3270  | 6215       | 147   | 42      | 903        | 22.5  | 40      |
| CG6465  | 3646       | 78    | 46      | 226        | 5.8   | 39      |
| CG6125  | 4530       | 122   | 37      | 319        | 8.3   | 38      |
| CG15221 | 594        | 13    | 45      | 62         | 1.7   | 36      |
| CG5697  | 3029       | 82    | 37      | 302        | 8.3   | 36      |
| CG31663 | 1365       | 36    | 38      | 210        | 5.8   | 36      |
| CG34456 | 303        | 8     | 38      | 67         | 2     | 34      |
| CG30016 | 3945       | 112   | 35      | 1503       | 45    | 33      |
| CG17027 | 1526       | 41    | 37      | 210        | 6.8   | 31      |
| CG2759  | 1571       | 39    | 40      | 127        | 4.3   | 30      |

|         |      |      |    |      |      |    |
|---------|------|------|----|------|------|----|
| CG2187  | 2332 | 72   | 32 | 20   | 0.7  | 29 |
| CG31380 | 948  | 27   | 34 | 112  | 4    | 28 |
| CG9702  | 2377 | 67   | 35 | 223  | 8    | 28 |
| CG10626 | 348  | 9    | 36 | 22   | 0.8  | 28 |
| CG8837  | 1088 | 17   | 61 | 101  | 3.7  | 27 |
| CG32843 | 992  | 28   | 35 | 45   | 1.8  | 25 |
| CG33281 | 1936 | 39   | 49 | 131  | 6    | 22 |
| CG9717  | 1989 | 37   | 53 | 113  | 5.4  | 21 |
| CG4484  | 1386 | 44   | 31 | 133  | 6.4  | 21 |
| CG15088 | 918  | 13   | 68 | 95   | 5.1  | 19 |
| CG15556 | 1187 | 33   | 36 | 69   | 4.6  | 15 |
| CG1139  | 1727 | 30   | 58 | 116  | 7.8  | 15 |
| CG17636 | 811  | 26   | 31 | 119  | 2.4  | 50 |
| CG15406 | 4941 | 165  | 30 | 1106 | 20.5 | 54 |
| CG2680  | 3243 | 110  | 30 | 747  | 15.8 | 47 |
| CG17522 | 3138 | 114  | 28 | 434  | 9.2  | 47 |
| CG8791  | 2754 | 98   | 28 | 178  | 3.8  | 47 |
| CG7882  | 3485 | 129  | 27 | 1010 | 21   | 48 |
| CG3380  | 6251 | 227  | 27 | 582  | 14   | 42 |
| CG2196  | 7242 | 275  | 26 | 1854 | 33   | 56 |
| CG13309 | 5652 | 214  | 26 | 3051 | 75   | 41 |
| CG10513 | 6469 | 309  | 21 | 1172 | 28   | 42 |
| CG14857 | 182  | 8    | 21 | 90   | 2.2  | 41 |
| CG31097 | 374  | 19   | 20 | 101  | 1.5  | 67 |
| CG9259  | 7558 | 370  | 19 | 2756 | 49   | 56 |
| CG3290  | 5919 | 314  | 19 | 856  | 16   | 54 |
| CG33258 | 6982 | 383  | 18 | 1051 | 15.7 | 67 |
| CG11892 | 7339 | 506  | 14 | 2885 | 52   | 55 |
| CG10514 | 6203 | 438  | 14 | 1690 | 31   | 55 |
| CG6726  | 8244 | 585  | 14 | 1912 | 36   | 53 |
| CG3168  | 7340 | 734  | 10 | 3617 | 82   | 44 |
| CG42807 | 7441 | 1112 | 7  | 1680 | 35   | 48 |
| CG7874  | 6383 | 1213 | 5  | 5921 | 136  | 44 |

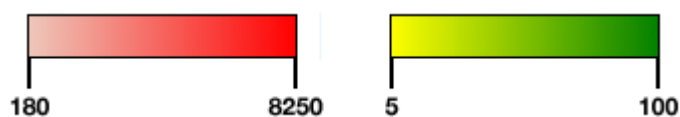

The abundance values for FlyAtlas 1 are in arbitrary units. The 'Enrich.' column is the enrichment calculated by dividing the absolute value of expression in Malpighian tubules by that in whole flies.

**Table S6.** Genes for which there are no data in FlyAtlas 2 because their transcripts are indistinguishable from those of other genes

| <b>Masked Gene</b> | <b>Symbol</b>       | <b>Masking Gene</b> | <b>Symbol</b> |
|--------------------|---------------------|---------------------|---------------|
| FBgn0003067        | Pepck               | FBgn0266488         | CG45087       |
| FBgn0004407        | DNApol- $\gamma$ 35 | FBgn0064115         | GatC          |
| FBgn0024182        | waw                 | FBgn0024251         | bbx           |
| FBgn0025355        | SuUR                | FBgn0266540         | CG45101       |
| FBgn0025825        | HDAC3               | FBgn0266539         | CG45100       |
| FBgn0026778        | Rad1                | FBgn0085343         | Sws1          |
| FBgn0027358        | Tim9b               | FBgn0031041         | CG12788       |
| FBgn0028581        | mei-217             | FBgn0002709         | mei-218       |
| FBgn0029154        | Menl-1              | FBgn0029153         | Menl-2        |
| FBgn0030298        | Or10a               | FBgn0045502         | Gr10a         |
| FBgn0031159        | CG11566             | FBgn0064123         | stg1          |
| FBgn0031454        | CG9960              | FBgn0031455         | Snapin        |
| FBgn0032755        | CG17344             | FBgn0263982         | CG43731       |
| FBgn0033693        | CG13175             | FBgn0053964         | CG33964       |
| FBgn0034649        | PIG-M               | FBgn0259726         | CG42380       |
| FBgn0039367        | CG17197             | FBgn0039366         | CG17198       |
| FBgn0040715        | CG15386             | FBgn0259717         | CG42371       |
| FBgn0042182        | CG18749             | FBgn0064126         | CG33722       |
| FBgn0050072        | Obp50c              | FBgn0050073         | Obp50b        |
| FBgn0050080        | CG30080             | FBgn0261538         | CG42662       |
| FBgn0050100        | CG30100             | FBgn0259718         | CG42372       |
| FBgn0050481        | mRpL53              | FBgn0053155         | CG33155       |
| FBgn0052298        | CG32298             | FBgn0052299         | CG32299       |
| FBgn0061361        | CG33786             | FBgn0061362         | CG33785       |
| FBgn0085206        | CG34177             | FBgn0085207         | CG34178       |
| FBgn0085344        | CG34315             | FBgn0005654         | lat           |
| FBgn0085346        | CG34317             | FBgn0260468         | CG7950        |
| FBgn0250911        | CG42245             | FBgn0035357         | MEP-1         |
| FBgn0259199        | Snup                | FBgn0259200         | CG42304       |
| FBgn0259202        | CG42306             | FBgn0034372         | Gint3         |
| FBgn0259709        | CG42363             | FBgn0259708         | CG42362       |
| FBgn0259721        | CG42375             | FBgn0260464         | CG9288        |
| FBgn0259725        | CG42379             | FBgn0259726         | CG42380       |
| FBgn0259727        | CG42381             | FBgn0259726         | CG42380       |
| FBgn0259730        | tal-1A              | FBgn0259733         | tal-AA        |
| FBgn0259731        | tal-2A              | FBgn0259733         | tal-AA        |
| FBgn0259732        | tal-3A              | FBgn0259733         | tal-AA        |
| FBgn0259933        | CG42456             | FBgn0035436         | CG12016       |
| FBgn0259990        | CG42487             | FBgn0039565         | CG4884        |
| FBgn0259991        | CG42488             | FBgn0039339         | CG5116        |
| FBgn0260222        | CG42496             | FBgn0050290         | Ppcdc         |
| FBgn0260223        | CG42497             | FBgn0027360         | Tim10         |

|             |                 |             |                 |
|-------------|-----------------|-------------|-----------------|
| FBgn0260224 | CG42498         | FBgn0039405 | PIG-P           |
| FBgn0260228 | CG42502         | FBgn0040992 | CG10570         |
| FBgn0260229 | CG42503         | FBgn0039280 | Mocs2           |
| FBgn0260231 | CG42505         | FBgn0260230 | CG42504         |
| FBgn0260237 | CG42511         | FBgn0037689 | CG8135          |
| FBgn0260401 | MED9            | FBgn0260392 | CG42518         |
| FBgn0260454 | CG17139         | FBgn0260453 | CG17140         |
| FBgn0260759 | CG42557         | FBgn0260760 | CG42558         |
| FBgn0261353 | Ccdc56          | FBgn0261381 | mtTFB1          |
| FBgn0261357 | CG42634         | FBgn0261358 | CG42635         |
| FBgn0261536 | CG42660         | FBgn0261537 | CG42661         |
| FBgn0261679 | CG42726         | FBgn0261680 | CG42727         |
| FBgn0261683 | B9d2            | FBgn0261697 | tectonic        |
| FBgn0261704 | CG42740         | FBgn0027544 | CG2217          |
| FBgn0261837 | pre-mod(mdg4)-T | FBgn0261838 | pre-mod(mdg4)-Z |
| FBgn0262837 | CG43201         | FBgn0262807 | CG43178         |
| FBgn0263387 | CG43439         | FBgn0250849 | CG32388         |
| FBgn0264298 | CG43776         | FBgn0264297 | CG43775         |
| FBgn0264364 | CG43816         | FBgn0045827 | CG13245         |
| FBgn0265083 | CG44194         | FBgn0038107 | CG17327         |
| FBgn0265968 | Tfb5            | FBgn0031668 | CG31917         |
| FBgn0266195 | Tgs1            | FBgn0261019 | moi             |
| FBgn0266435 | CG45065         | FBgn0266434 | CG45064         |
| FBgn0266438 | PIG-Z           | FBgn0266439 | CG45069         |
| FBgn0266445 | CG45075         | FBgn0266450 | Kr-h1           |
| FBgn0266489 | CG45088         | FBgn0027581 | CG6191          |
| FBgn0266525 | CG45092         | FBgn0033095 | CG3409          |
| FBgn0266526 | CG45093         | FBgn0050497 | CG30497         |
| FBgn0266538 | CG45099         | FBgn0038927 | CG6015          |

‘Masked’ Genes are those that were absent from the FPKM or RPM output of the computational analysis of the sequence reads. In each case an overlapping gene was identified with an identical transcript and this is referred to as a ‘masking’ gene and is listed in the second half of the table.



**Table S8.** RNA genes detected in FlyAtlas 2

| <b>Type</b>   | <b>Total</b> | <b>Signal</b> |
|---------------|--------------|---------------|
| All RNA genes | 3603         | 1828          |
| pseudogene    | 232          | 74            |
| ncRNA         | 549          | 370           |
| snRNA         | 31           | 24            |
| tRNA          | 314          | 8             |
| rRNA          | 151          | 6             |
| snoRNA        | 288          | 214           |
| lincRNA       | 1800         | 1003          |
| pre miRNA     | 238          | 129           |

A signal was regarded as an FPKM greater than 2 or an RPM (microRNAs) greater than 100 in at least one tissue.

**Figure S1.** Relational database schema for FlyAtlas 2

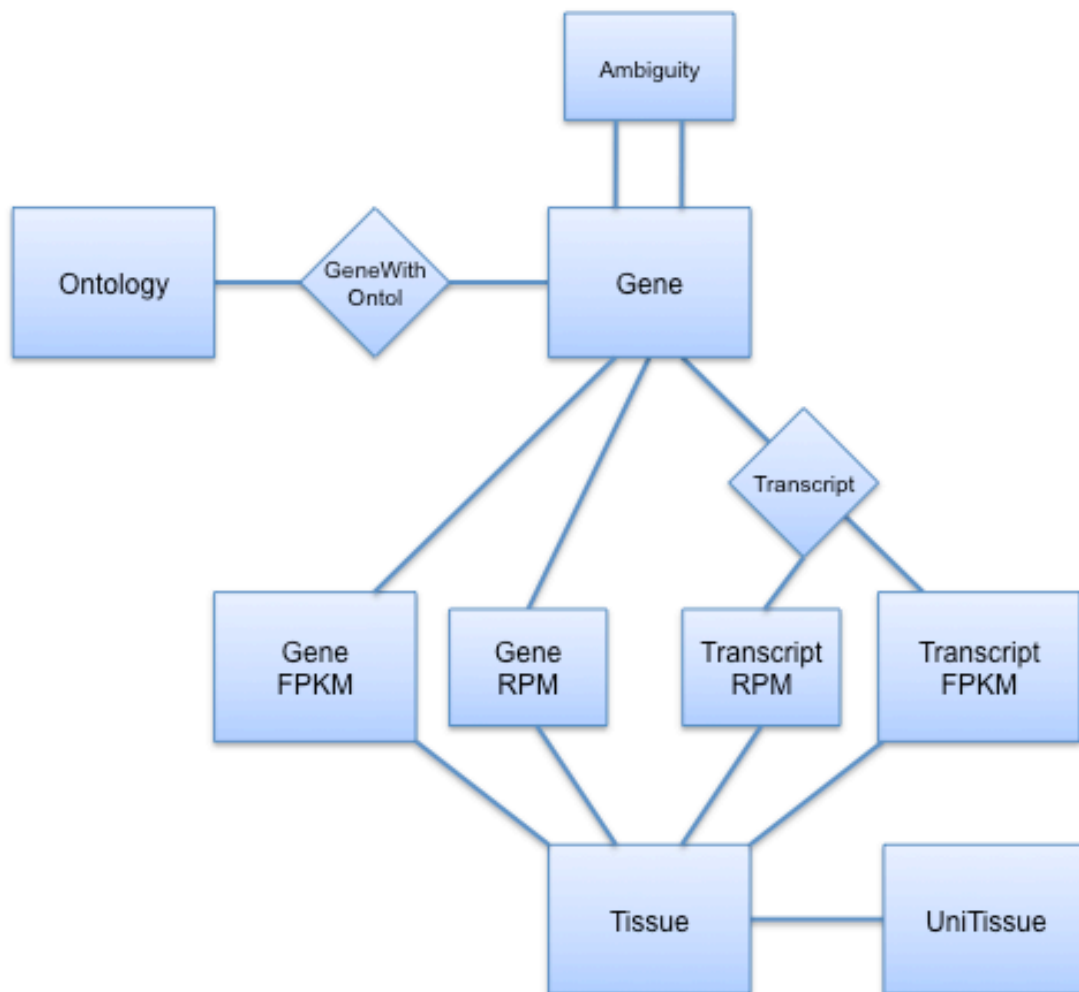

**Figure S2.** Validation of FlyAtlas 2 data set by reference to genes the transcripts of which show well-characterized sexual dimorphism in soma

*tra*

| Transcript |             | Male |    |    |    |    | Female |    |    |    |    | Larval |    |    |    |    |    |    |    |    |    |
|------------|-------------|------|----|----|----|----|--------|----|----|----|----|--------|----|----|----|----|----|----|----|----|----|
| Name       | ID          | Hd   | Mg | Hg | Tu | Ts | Cs     | Hd | Mg | Hg | Tu | Ov     | Cs | Ns | Mg | Hg | Tu | Fb | Sg | Tr | Cs |
| RA         | FBtr0075364 |      |    |    |    |    |        |    |    |    |    |        |    |    |    |    |    |    |    |    |    |
| RB         | FBtr0100244 |      |    |    |    |    |        |    |    |    |    |        |    |    |    |    |    |    |    |    |    |

The isoform FBtr0075364, expressed only in females, is the key factor allowing splicing of exon 4 of *dsx* in females to produce *dsx* transcript FBtr008176 (3).

*dsx*

| Transcript |             | Male |    |    |    |    | Female |    |    |    |    | Larval |    |    |    |    |    |    |    |    |    |
|------------|-------------|------|----|----|----|----|--------|----|----|----|----|--------|----|----|----|----|----|----|----|----|----|
| Name       | ID          | Hd   | Mg | Hg | Tu | Ts | Cs     | Hd | Mg | Hg | Tu | Ov     | Cs | Ns | Mg | Hg | Tu | Fb | Sg | Tr | Cs |
| RB         | FBtr0081760 |      |    |    |    |    |        |    |    |    |    |        |    |    |    |    |    |    |    |    |    |
| RC         | FBtr0081761 |      |    |    |    |    |        |    |    |    |    |        |    |    |    |    |    |    |    |    |    |
| RD         | FBtr0330073 |      |    |    |    |    |        |    |    |    |    |        |    |    |    |    |    |    |    |    |    |
| RE         | FBtr0330074 |      |    |    |    |    |        |    |    |    |    |        |    |    |    |    |    |    |    |    |    |
| RF         | FBtr0339710 |      |    |    |    |    |        |    |    |    |    |        |    |    |    |    |    |    |    |    |    |

The differential splicing of exon 4 causes FBtr0081761 to be expressed only in females, and FBtr0330073 in males, as explained in the main text.

*fru*

| Transcript |             | Male |    |    |    |    | Female |    |    |    |    | Larval |    |    |    |    |    |    |    |    |    |    |
|------------|-------------|------|----|----|----|----|--------|----|----|----|----|--------|----|----|----|----|----|----|----|----|----|----|
| Name       | ID          | Hd   | Mg | Hg | Tu | Ts | Cs     | Hd | Cr | Mg | Hg | Tu     | Ov | Cs | Ns | Mg | Hg | Tu | Fb | Sg | Tr | Cs |
| RA         | FBtr0083646 |      |    |    |    |    |        |    |    |    |    |        |    |    |    |    |    |    |    |    |    |    |
| RB         | FBtr0083641 |      |    |    |    |    |        |    |    |    |    |        |    |    |    |    |    |    |    |    |    |    |
| RC         | FBtr0083642 |      |    |    |    |    |        |    |    |    |    |        |    |    |    |    |    |    |    |    |    |    |
| RD         | FBtr0083647 |      |    |    |    |    |        |    |    |    |    |        |    |    |    |    |    |    |    |    |    |    |
| RE         | FBtr0083643 |      |    |    |    |    |        |    |    |    |    |        |    |    |    |    |    |    |    |    |    |    |
| RF         | FBtr0083644 |      |    |    |    |    |        |    |    |    |    |        |    |    |    |    |    |    |    |    |    |    |
| RG         | FBtr0083645 |      |    |    |    |    |        |    |    |    |    |        |    |    |    |    |    |    |    |    |    |    |
| RH         | FBtr0083640 |      |    |    |    |    |        |    |    |    |    |        |    |    |    |    |    |    |    |    |    |    |
| RI         | FBtr0083648 |      |    |    |    |    |        |    |    |    |    |        |    |    |    |    |    |    |    |    |    |    |
| RJ         | FBtr0083649 |      |    |    |    |    |        |    |    |    |    |        |    |    |    |    |    |    |    |    |    |    |
| RK         | FBtr0083650 |      |    |    |    |    |        |    |    |    |    |        |    |    |    |    |    |    |    |    |    |    |
| RL         | FBtr0083651 |      |    |    |    |    |        |    |    |    |    |        |    |    |    |    |    |    |    |    |    |    |
| RM         | FBtr0083652 |      |    |    |    |    |        |    |    |    |    |        |    |    |    |    |    |    |    |    |    |    |
| RN         | FBtr0301284 |      |    |    |    |    |        |    |    |    |    |        |    |    |    |    |    |    |    |    |    |    |

Differences in exons 2 and 3 resulting from alternative splicing results in male-specific and female-specific forms of *fru*, the male-specific ones being implicated in control of courtship behaviour (4). The isoform here found only in the heads of males, FBtr0083645, shows the male-specific splice, whereas FBtr0083642, here found only in females, shows the female-specific splice.



**Figure S3.** Responsive adaptation of FlyAtlas 2 search output to mobile devices

Symbol **dsx**  
 Name **doublesex**  
 Annotation Symbol **CG11094**  
 FlyBase ID **FBgn0000504**

| Tissue         | Male |        | Female |        | Larval |        |
|----------------|------|--------|--------|--------|--------|--------|
|                | FPKM | Enrich | FPKM   | Enrich | FPKM   | Enrich |
| Head           | 11   | 0.6    | 13     | 2.7    |        |        |
| Eye            |      |        |        |        |        |        |
| Brain / CNS    |      |        |        |        | 2.2    | 1.1    |
| Thoracicoa...  |      |        |        |        |        |        |
| Crop           |      |        |        |        |        |        |
| Midgut         | 12   | 0.7    | 7.7    | 1.6    | 1.6    | n.a.   |
| Hindgut        | 4.2  | 0.2    | 6.4    | 1.3    | 0.5    | n.a.   |
| Tubule         | 20   | 1.1    | 19     | 3.9    | 1.3    | n.a.   |
| Fat body       |      |        |        |        | 11     | 5.6    |
| Salivary gl... |      |        |        |        | 0.8    | n.a.   |
| Heart          |      |        |        |        |        |        |
| Trachea        |      |        |        |        | 0.8    | n.a.   |
| Ovary          |      |        | 0.9    | 0.2    |        |        |
| Virgin Sper... |      |        |        |        |        |        |
| Mated Spe...   |      |        |        |        |        |        |
| Testis         | 5.0  | 0.3    |        |        |        |        |
| Accessory ...  |      |        |        |        |        |        |
| Carcass        | 15   | 0.8    | 19     | 3.8    | 2.2    | 1.1    |
| Anal pad       |      |        |        |        |        |        |

↓  
 Rotate to see Transcript Table

|                    |     |     |    |     |     |     |  |
|--------------------|-----|-----|----|-----|-----|-----|--|
| Ovary              |     |     |    | 0.9 | 0.2 |     |  |
| Virgin Spermatheca |     |     |    |     |     |     |  |
| Mated Spermatheca  |     |     |    |     |     |     |  |
| Testis             | 5.0 | 0.3 |    |     |     |     |  |
| Accessory glands   |     |     |    |     |     |     |  |
| Carcass            | 15  | 0.8 | 19 | 3.8 | 2.2 | 1.1 |  |
| Anal pad           |     |     |    |     |     |     |  |

↓

| Transcript | Male |    |    |    |    |    |    |    |    |    | Female |    |    |    |    |    |    |    |    |    | Larval |    |    |    |    |    |    |    |    |    |    |    |    |    |    |    |    |    |    |  |  |  |  |
|------------|------|----|----|----|----|----|----|----|----|----|--------|----|----|----|----|----|----|----|----|----|--------|----|----|----|----|----|----|----|----|----|----|----|----|----|----|----|----|----|----|--|--|--|--|
|            | Hd   | Ey | Br | Tg | Cr | Mg | Hg | Tu | Fb | Sg | Ht     | Ts | Ag | Cs | Ap | Hd | Ey | Br | Tg | Cr | Mg     | Hg | Tu | Fb | Sg | Ht | Qv | Vs | Ms | Cs | Ap | Ns | Mg | Hg | Tu | Fb | Sg | Tr | Cs |  |  |  |  |
| RB         |      |    |    |    |    |    |    |    |    |    |        |    |    |    |    |    |    |    |    |    |        |    |    |    |    |    |    |    |    |    |    |    |    |    |    |    |    |    |    |  |  |  |  |
| RC         |      |    |    |    |    |    |    |    |    |    |        |    |    |    |    |    |    |    |    |    |        |    |    |    |    |    |    |    |    |    |    |    |    |    |    |    |    |    |    |  |  |  |  |
| RD         |      |    |    |    |    |    |    |    |    |    |        |    |    |    |    |    |    |    |    |    |        |    |    |    |    |    |    |    |    |    |    |    |    |    |    |    |    |    |    |  |  |  |  |
| RE         |      |    |    |    |    |    |    |    |    |    |        |    |    |    |    |    |    |    |    |    |        |    |    |    |    |    |    |    |    |    |    |    |    |    |    |    |    |    |    |  |  |  |  |
| RF         |      |    |    |    |    |    |    |    |    |    |        |    |    |    |    |    |    |    |    |    |        |    |    |    |    |    |    |    |    |    |    |    |    |    |    |    |    |    |    |  |  |  |  |

↓

An iPhone 7 (375×667 px) is illustrated. On an iPhone 5 (320×568 px) in portrait view the table is visible, but not the area below it.

### References for Supplementary Data

1. Chintapalli, V.R., Wang, J. and Dow, J.A.T. (2007) Using FlyAtlas to identify better *Drosophila melanogaster* models of human disease. *Nat Genet*, **39**, 715-720.
2. Fagegaltier, D., König, A., Gordon, A., Lai, E.C., Gingeras, T.R., Hannon, G.J. and Shcherbata, H.R. (2014) A genome-wide survey of sexually dimorphic expression of *Drosophila* miRNAs identifies the steroid hormone-induced miRNA let-7 as a regulator of sexual identity. *Genetics*, **198**, 647-668.
3. Lynch, K.W. and Maniatis, T. (1996) Assembly of specific SR protein complexes on distinct regulatory elements of the *Drosophila* doublesex splicing enhancer. *Genes & Development*, **10**, 2089-2101.
4. Ryner, L.C., Goodwin, S.F., Castrillon, D.H., Anand, A., Vilella, A., Baker, B.S., Hall, J.C., Taylor, B.J. and Wasserman, S.A. (1996) Control of male sexual behavior and sexual orientation in *Drosophila* by the fruitless gene. *Cell*, **87**, 1079-1089.
